# Supplementary material for: Prognostic Significance of Cardiac Output in Postcapillary Pulmonary Hypertension: Estimated Fick vs. Thermodilution
Source: Research Square preprint supplement (doi:10.21203/rs.3.rs-7325994/v1), 2025-09-22
Supplement: Supplementary file 1 [file 889b2622254f36ee4d5d9a8e.docx]

**Page2, Supplementary Table 1 Three formulas for oxygen consumption calculation**

**Page3, Supplementary Table 2 Optimal critical values of cardiac index calculated by X-tile software**

**Supplementary Table 1 Three formulas for oxygen consumption calculation**

|  | Sex | Formula |
| --- | --- | --- |
| Dehmer | Male | 125×BSA |
|  | Female | 125×BSA |
| Lafarge | Male | (138－11.49×ln Age＋0.378×HR）×BSA |
|  | Female | (138－17.04×ln Age＋0.378×HR）×BSA |
| Bergstra | Male | 157.3×BSA＋100－10.5×ln Age＋4.8 |
|  | Female | 157.3×BSA－10.5×ln Age＋4.8 |

BSA = body surface area; HR = heart rate.

**Supplementary Table 2 Optimal critical values of cardiac index calculated by X-tile software**

| Cardiac index | Thermodilution | | Dehmer | | | | Lafarge | | Bergstra | |
| --- | --- | --- | --- | --- | --- | --- | --- | --- | --- | --- |
| (L·min-1·m-2) | N | Value | | N | Value | N | | Value | N | Value |
| Low | 48 | ≤ 1.50 | | 26 | ≤ 1.16 | 27 | | ≤ 1.11 | 34 | ≤ 1.44 |
| Moderate | 73 | 1.53 - 2.16 | | 53 | 1.17 - 1.51 | 59 | | 1.13 - 1.43 | 60 | 1.46 - 1.78 |
| High | 136 | ≥ 2.20 | | 178 | ≥ 1.52 | 171 | | ≥ 1.44 | 163 | ≥ 1.79 |
